# Supplementary material
Source: ML conference proceedings conference paper supplement (https://openaccess.thecvf.com/content/ICCV2023/html/Yadav_FCCNs_Fully_Complex-valued_ICCV_2023_paper.html)
Supplement: Supplementary file 1 [file Yadav_FCCNs_Fully_Complex-valued_ICCV_2023_supplemental.pdf]

# Supplementary material for FCCNs: Fully Complex-valued Convolutional Networks using Complex-valued Color Model and Loss Function

## 1. Complex-valued Cross Entropy Loss

Recall how we derived our complex-valued loss  $f_{comp} : \mathbb{C}^{H \times W \times 3} \rightarrow \mathbb{C}^c$  from the original cross-entropy loss, which is given as:

$$\mathcal{L}_{comp} = -\frac{1}{n} \sum_{j=1}^n \sum_{k=1}^c y_{jk} \log z_{jk} \quad (1)$$

where  $z_{jk}$  is the complex-valued output, and  $y_{jk}$  is the ground truth label (with phase equal to 0). To establish the differentiability of this loss, we must ensure the differentiability of the function  $\log z_{jk}$ , which is the logarithm of a complex number.

Let  $f(z) = \log(z)$ , where  $z = a + ib$ . Note that if  $f(z)$  can be expanded to a complex form  $u(a, b) + iv(a, b)$ , for it to be differentiable, it must satisfy Cauchy-Riemann equations[2], which are given as:

$$\frac{\partial u}{\partial a} = \frac{\partial v}{\partial b} \quad \text{and} \quad \frac{\partial v}{\partial a} = -\frac{\partial u}{\partial b} \quad (2)$$

Let's prove that logarithm of a complex number satisfies these equations.

**Proof:** Given function  $f(z) = \log(z)$ , where  $z \in \mathbb{C}$ , i.e.,  $z = a + ib$ , we can compute the magnitude  $|z|$  and phase  $\theta$  of  $z$  as follows:

$$|z| = \sqrt{a^2 + b^2} \quad \text{and} \quad \theta = \tan^{-1}(b/a)$$

Since  $z = |z|e^{i\theta}$ , using above equations, we can expand  $\log(z)$  into a complex form in the following manner:

$$\log(z) = (1/2) \log(a^2 + b^2) + i \tan^{-1}(b/a) \quad (3)$$

Thus,  $u = (1/2) \log(a^2 + b^2)$  and  $v = \tan^{-1}(b/a)$ . Now, let's compute the four partial derivatives required in Cauchy-Riemann equations 2:

$$\frac{\partial u}{\partial a} = \frac{\partial}{\partial a} (1/2) \log(a^2 + b^2) = \frac{a}{a^2 + b^2} \quad (4)$$

$$\frac{\partial v}{\partial b} = \frac{\partial}{\partial b} \tan^{-1}(b/a) = \frac{a}{a^2 + b^2} \quad (5)$$

$$\frac{\partial v}{\partial a} = \frac{\partial}{\partial a} \tan^{-1}(b/a) = \frac{-b}{a^2 + b^2} \quad (6)$$

$$\frac{\partial u}{\partial b} = \frac{\partial}{\partial b} (1/2) \log(a^2 + b^2) = \frac{b}{a^2 + b^2} \quad (7)$$

From the above equations, we can conclude that the logarithm of a complex number indeed satisfies Cauchy-Riemann equations 2. Hence,  $\log(z)$  is differentiable, and so is our proposed loss  $\mathcal{L}_{comp}$ .

## 2. Addition Observations

Table 1. Transfer learning experiment on Modern Office-31 dataset

| Modern Office-31 | DCN[3] | CNN[1] | FCCN         |
|------------------|--------|--------|--------------|
| Accuracy         | 93.71  | 96.61  | <b>97.23</b> |

For observing the generalization capability of our method, we show results on Finetuned ResNet152, which was pre-trained on ImageNet on webcam subset of Modern Office-31 dataset. We show our results for different methods in Table 1.

## References

- [1] Alex Krizhevsky, Geoffrey Hinton, et al. Learning multiple layers of features from tiny images. 2009. **1**
- [2] Elias M Stein and Rami Shakarchi. *Complex analysis*, volume 2. Princeton University Press, 2010. **1**
- [3] Chiheb Trabelsi, Olexa Bilaniuk, Ying Zhang, Dmitriy Serdyuk, Sandeep Subramanian, João Felipe Santos, Soroush Mehri, Negar Rostamzadeh, Yoshua Bengio, and Christopher J. Pal. Deep complex networks. In *6th International Conference on Learning Representations, ICLR 2018, Vancouver, BC, Canada, April 30 - May 3, 2018, Conference Track Proceedings*. OpenReview.net, 2018. **1**
